# Supplementary material
Source: PubMed Central journal article supplement (PMC3808588)
Supplement: 1304839110_pnas.201304839SI.pdf [file 1304839110_pnas.201304839SI.pdf]

# Supporting Information

Simpson-Lavy and Johnston 10.1073/pnas.1304839110

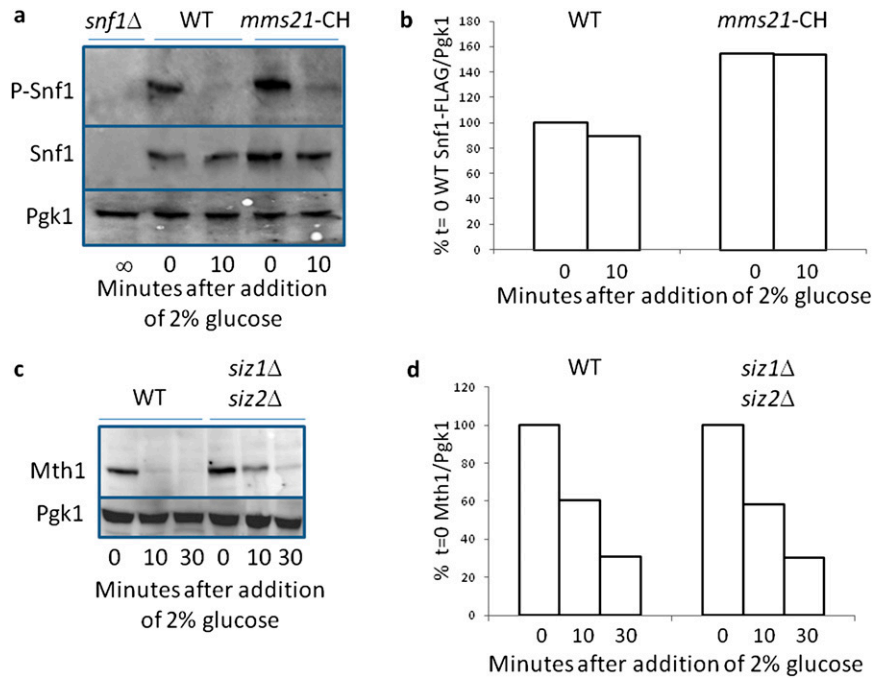

**Fig. S1.** Other small ubiquitin-like modifier protein (SUMO) ligases do not regulate Mth1 stability in glucose. (A) Cells were grown in 2% galactose at 30 °C overnight. The temperature was elevated to 34 °C for 1 h before addition of preheated glucose to 2%. Samples were processed for immunoblots at the indicated times. (B) Quantification of Snf1 levels in A. Amount of Snf1 is shown relative to wild-type in galactose-grown cells ( $t = 0$ ). (C) Cells were grown in 2% galactose at 30 °C overnight. Glucose was added to 2% and samples were processed for immunoblots at the indicated times. (D) Quantification of C. Amount of Mth1 is shown relative to each strain in the absence of glucose ( $t = 0$ ).

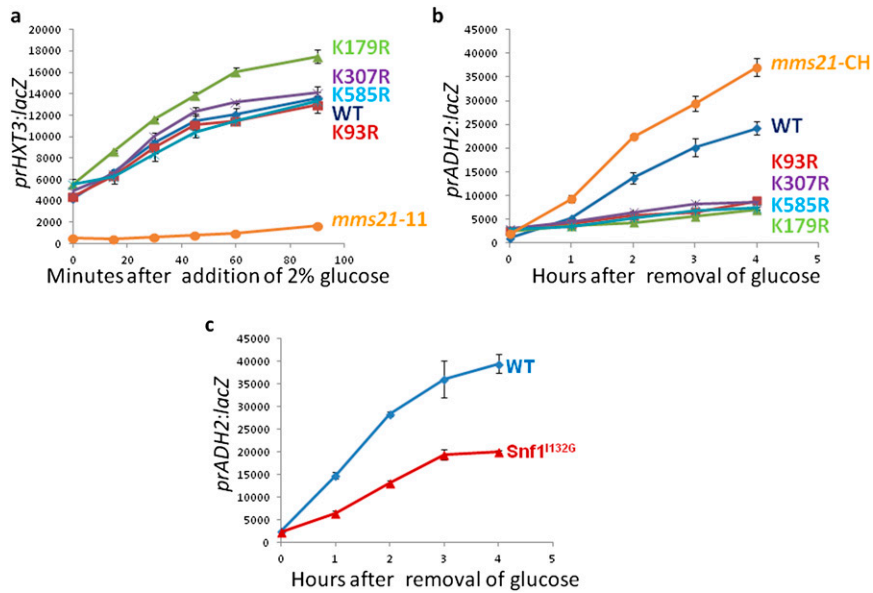

**Fig. S2.** Other SUMO motifs in Snf1 are nonfunctional. (A) *snf1Δ* cells with plasmids bearing wild-type *SNF1* or *SNF1* with the indicated mutations, or *snf1Δmms21-11* cells with a plasmid bearing wild-type *SNF1* were grown overnight at 30 °C in 2% galactose. Glucose was added to 2%, and samples were taken for β-galactosidase assays at the indicated times. *n* = 3. Plasmids are listed in Table S3. (B) *snf1Δ* cells with plasmids bearing wild-type *SNF1* or *SNF1* with the indicated mutations, or *snf1Δmms21-CH* cells with a plasmid bearing wild-type *SNF1* were grown overnight at 30 °C in 4% glucose, then for 1 h at 34 °C. Cells were washed three times with water at 34 °C, and resuspended in medium containing 3% glycerol at 34 °C. Samples were taken for β-galactosidase assays at the indicated times. *n* = 3. Plasmids are listed in Table S3. (C) *snf1Δ* cells with plasmids bearing wild-type *SNF1* or *SNF1<sup>I132G</sup>* were grown overnight at 30 °C in 4% glucose. Cells were washed three times with water and resuspended in medium containing 3% glycerol at 30 °C. Samples were taken for β-galactosidase assays at the indicated times. *n* = 3.

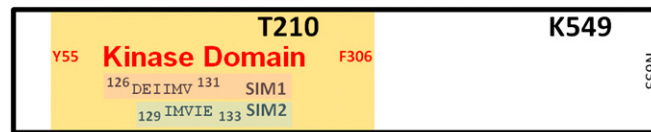

**Fig. S3.** Functional domains and amino acid residues of Snf1. Schematic diagram of Snf1 illustrating locations of domains and residues discussed herein.



**Table S1. Yeast strains**

| Name              | Genotype                                                                                             | Source         |
|-------------------|------------------------------------------------------------------------------------------------------|----------------|
| W303              | <i>leu2-3,112 trp1-1 can1-100 ura3-1 ade2-1 his3-11,15 [phi<sup>+</sup>] rad5-535, bud4, ssd1-d2</i> | Lab collection |
| G16               | W303 MATa RAD5                                                                                       | (1)            |
| T79               | W303 MATa RAD5 <i>mms21-11::LEU2</i>                                                                 | (1)            |
| T80-14            | W303 MATa RAD5 <i>mms21-11::URA3</i>                                                                 | (1)            |
| M21-CH            | W303 MATa RAD5 <i>mms21-CH::URA3</i>                                                                 |                |
| M21-CHu3          | W303 MATa RAD5 <i>mms21-CH::URA3::ura3</i>                                                           |                |
| Snf1KAN (CKY18)   | W303 MATa <i>snf1Δ::KAN</i>                                                                          | (2)            |
| Snf1U3            | W303 MATa <i>snf1Δ::URA3</i>                                                                         | J. Rutter      |
| Snf1KANm21-CH     | W303 MATa <i>snf1Δ::KAN mms21-CH::URA3</i>                                                           |                |
| Snf1KANm21-CHura3 | W303 MATa <i>snf1Δ::KAN mms21-CH::URA3::ura3</i>                                                     |                |
| BY4741            | MATa <i>his3Δ1 leu2Δ0/LYS2 met15Δ0 ura3Δ0</i>                                                        |                |
| BY4742            | MATa <i>his3Δ1 leu2Δ0 ura3Δ0 lys2Δ0 MET15</i>                                                        |                |
| ubc9-1 (ts)       | BY4741 <i>ubc9-1::NAT</i>                                                                            | T. Ravid       |
| YAC391            | MATa <i>siz1Δ::HygB siz2Δ::KAN, lyp1Δ::STE3pr::LEU2, his3Δ1 leu2Δ0 ura3Δ0</i>                        | (3)            |
| EY1274            | BY MATa <i>ulp1-ts::MET15 LYS2 STE3pr::LEU2 his3Δ1 ura3Δ0</i>                                        | (4)            |
| Ubp8              | BY4741 <i>ubp8::KAN</i>                                                                              |                |
| Ubp8M21CH         | BY4741 <i>ubp8::KAN mms21-CH::URA3::ura3</i>                                                         |                |
| Ubp8slx8          | BY4741 <i>ubp8::KAN slx8::URA3</i>                                                                   |                |

J. Rutter and T. Ravid, Department of Biochemistry, University of Utah School of Medicine, Salt Lake City, UT.

- Zhao X, Blobel G (2005) A SUMO ligase is part of a nuclear multiprotein complex that affects DNA repair and chromosomal organization. *Proc Natl Acad Sci USA* 102(13):4777–4782.
- Ratnakumar S, Kacherovsky N, Arms E, Young ET (2009) Snf1 controls the activity of *adr1* through dephosphorylation of Ser230. *Genetics* 182(3):735–745.
- Chavez A, George V, Agrawal V, Johnson FB (2010) Sumoylation and the structural maintenance of chromosomes (Smc) 5/6 complex slow senescence through recombination intermediate resolution. *J Biol Chem* 285(16):11922–11930.
- Wykoff DD, O'Shea EK (2005) Identification of sumoylated proteins by systematic immunoprecipitation of the budding yeast proteome. *Mol Cell Proteomics* 4(1):73–83.

**Table S2. Plasmids**

| Name          | Genotype                                 | Backbone*                | Mutations    | Source          |
|---------------|------------------------------------------|--------------------------|--------------|-----------------|
| pBM4560       | Mth1-9myc                                | pRS <b>313</b>           |              | Lab collection  |
| pBM5020       | Mth1-Stag                                | pRS <b>313</b>           |              | Lab collection  |
| pBGM18        | <i>prADH2::lacZ</i>                      | pRS <b>313, 315, 316</b> |              | (1)             |
| pBM2819       | <i>prHXT3::lacZ</i>                      | 2 μ URA3                 |              | Lab collection  |
| pBM3118       | <i>prHXT3::lacZ</i>                      | 2 μ LEU2                 |              | Lab collection  |
| pBM4924       | <i>prTET<sup>on</sup>::YCK1-Rgt2tail</i> | 2 μ TRP1                 |              | Lab collection  |
| Mms21-47      | <i>mms21-CH</i>                          | pUC19 URA3               | C200A H202A  | (2)             |
| pBM3926       | <i>prGAL1:His6-FLAG-Smt3(G98)</i>        | pRS <b>313, 315, 316</b> |              | (3)             |
| S12F          | Snf1-2FLAG                               | pRS <b>314, 315, 316</b> | I129A, K549R | (4)             |
| pYL199 (S18M) | Snf1-8myc                                | pRS <b>313, 314, 316</b> | I129A, K549R | (5)             |
| Snf1-as1      | Snf1 <sup>I132G</sup>                    | pRS <b>316</b>           |              | (6)             |
| Snf1          | Snf1                                     | pRS <b>316, 313</b>      |              | (6)             |
| GALulp1       | <i>prGAL1:GST-Ulp1</i>                   | 2 μ URA3                 |              | M. Hochstrasser |
| GALulp2       | <i>prGAL1:Ulp2-FLAG</i>                  | 2 μ TRP1                 |              | M. Hochstrasser |

M. Hochstrasser, Department of Molecular, Cellular and Developmental Biology, Yale University, New Haven, CT.

\*Selectable markers in pRS plasmids were changed by gap repair; the original plasmid that is the backbone of the named plasmid is in bold.

- Dombek KM, Voronkova V, Raney A, Young ET (1999) Functional analysis of the yeast Glc7-binding protein Reg1 identifies a protein phosphatase type 1-binding motif as essential for repression of ADH2 expression. *Mol Cell Biol* 19(9):6029–6040.
- Santa Maria SR, Gangavarapu V, Johnson RE, Prakash L, Prakash S (2007) Requirement of Nse1, a subunit of the Smc5-Smc6 complex, for Rad52-dependent postreplication repair of UV-damaged DNA in *Saccharomyces cerevisiae*. *Mol Cell Biol* 27(23):8409–8418.
- Johnson ES, Blobel G (1999) Cell cycle-regulated attachment of the ubiquitin-related protein SUMO to the yeast septins. *J Cell Biol* 147(5):981–994.
- Nayak V, et al. (2006) Structure and dimerization of the kinase domain from yeast Snf1, a member of the Snf1/AMPK protein family. *Structure* 14(3):477–485.
- Raines RT, McCormick M, Van Oosbree TR, Mierendorf RC (2000) The S.Tag fusion system for protein purification. *Methods Enzymol* 326:362–376.
- Shirra MK, et al. (2008) A chemical genomics study identifies Snf1 as a repressor of GCN4 translation. *J Biol Chem* 283(51):35889–35898.

**Table S3. Supplemental plasmids**

| Name | Genotype   | Backbone | Mutations                 | Source |
|------|------------|----------|---------------------------|--------|
| S12F | Snf1-2FLAG | pRS 316  | K93R, K179R, K307R, K585R | (1)    |

1. Nayak V, et al. (2006) Structure and dimerization of the kinase domain from yeast Snf1, a member of the Snf1/AMPK protein family. *Structure* 14(3):477–485.
